# Supplementary material for: A geospatial analysis of local intermediate snail host distributions provides insight into schistosomiasis risk within under-sampled areas of southern Lake Malawi
Source: Research Square preprint supplement (doi:10.21203/rs.3.rs-3949127/v3), 2024-06-10
Supplement: Supplementary file [file 1d010df5a8a3aa88557ddb61.pdf]

### **Construction of 200 prediction points along shoreline**

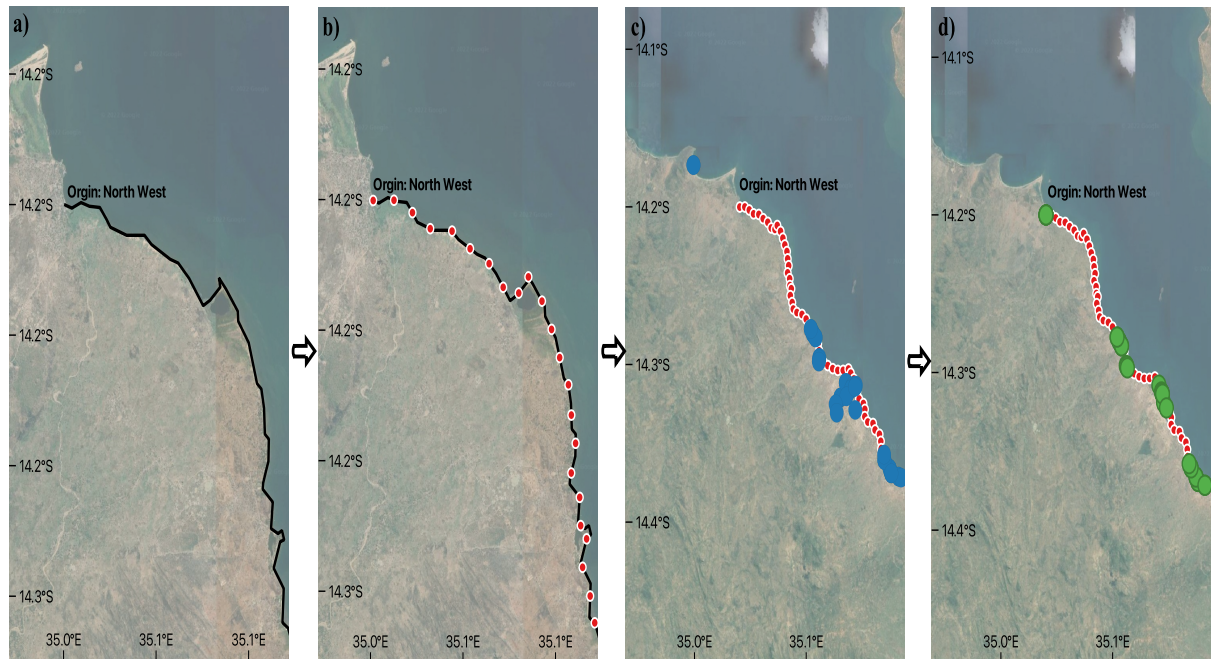

**Figure S1:** Flow diagram showing the stages for constructing the 200 predictions along the shoreline. **a)** A 2-D linestring was drawn by hand following the shoreline as shown by Google Satellite imagery, **b)** the linestring was re-sampled to 4000 equally spaced vertices and resampled them to 200 equally intervals (red dots), **c)** observed sampling site locations (blue dots), **d)** each observed sampling site location was snapped to its nearest vertex (green dots).

(a) *Biomphalaria* sp.

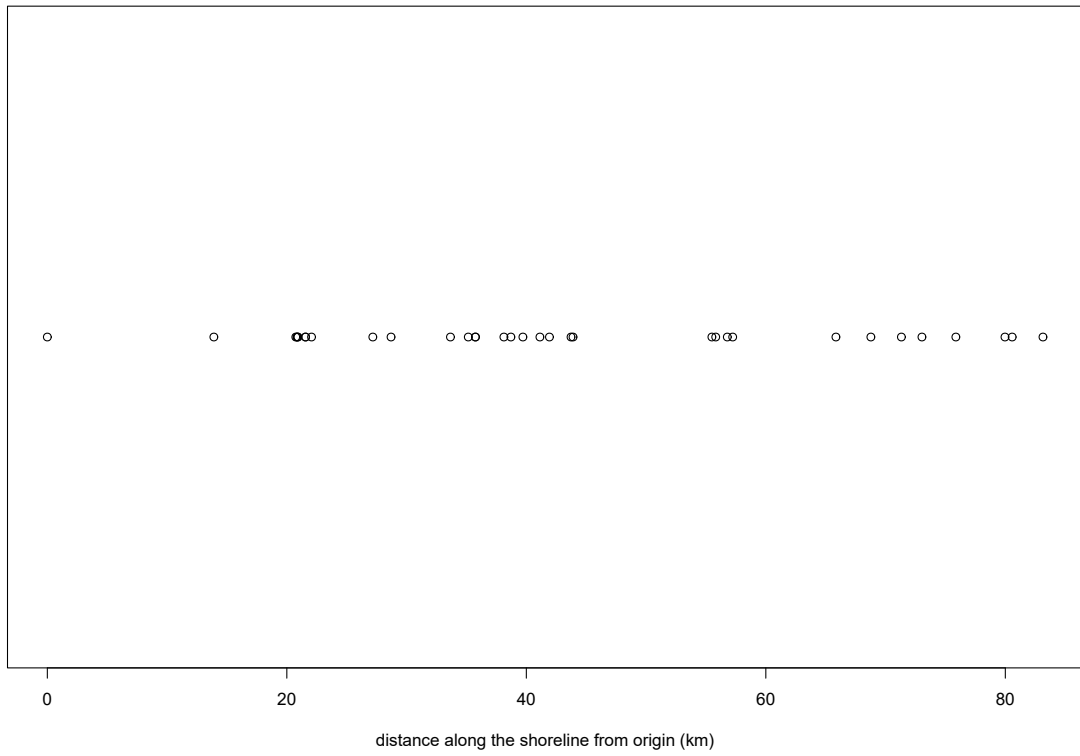

(a) *Bulinus* spp.

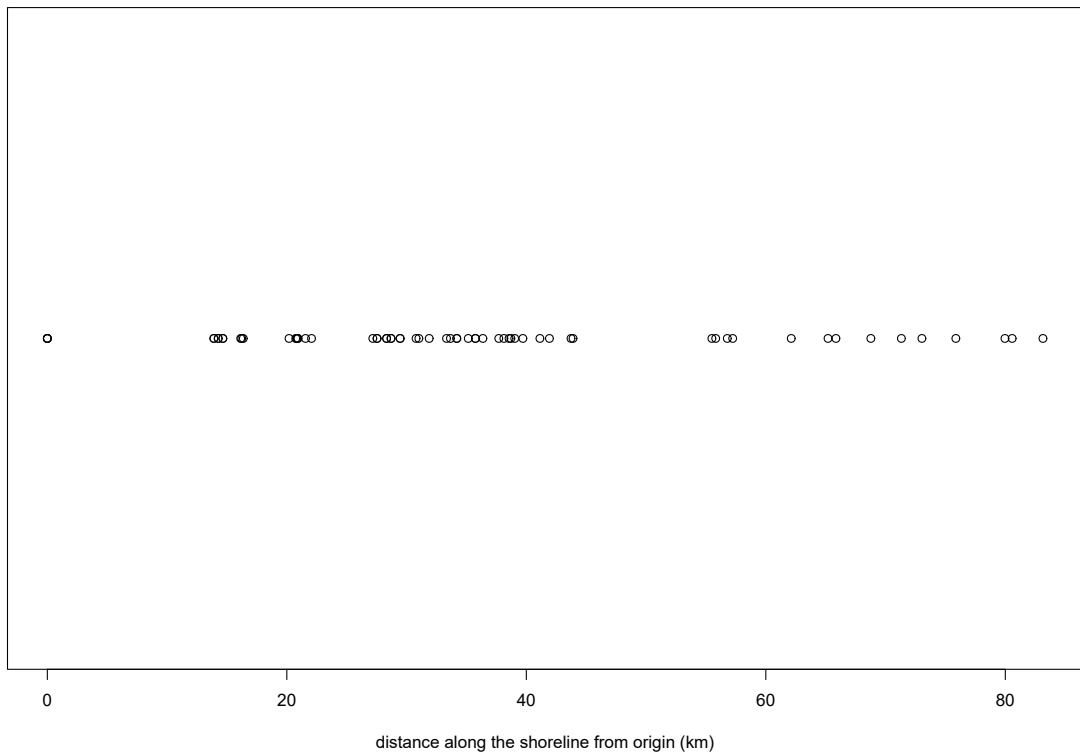

**Figure S2:** The distance along the line from the origin (northwest-most vertex) to each of the snapper observed sampling site locations for each species a) *Biomphalaria* sp. b) *Bulinus* spp..
