# Supplementary material for: A geospatial analysis of local intermediate snail host distributions provides insight into schistosomiasis risk within under-sampled areas of southern Lake Malawi
Source: Research Square preprint supplement (doi:10.21203/rs.3.rs-3949127/v3), 2024-06-10
Supplement: Supplementary file [file 7959501a4ab3fa768cf986b3.pdf]

Additional file 9: Supplementary information

1D result

(a) *Biomphalaria* sp.

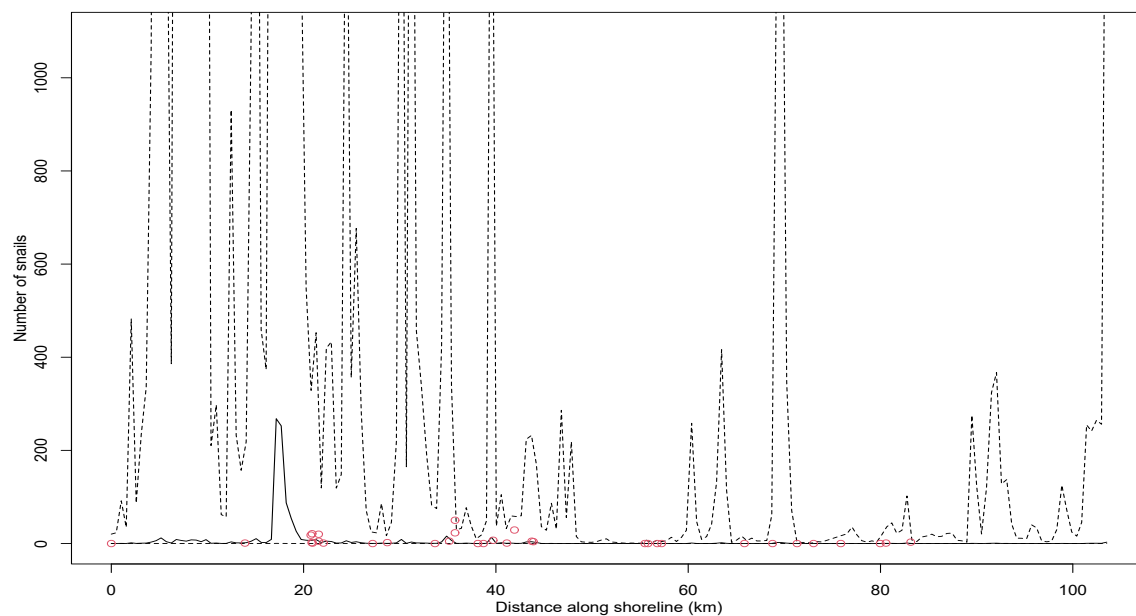

(b) *Bulinus* spp.

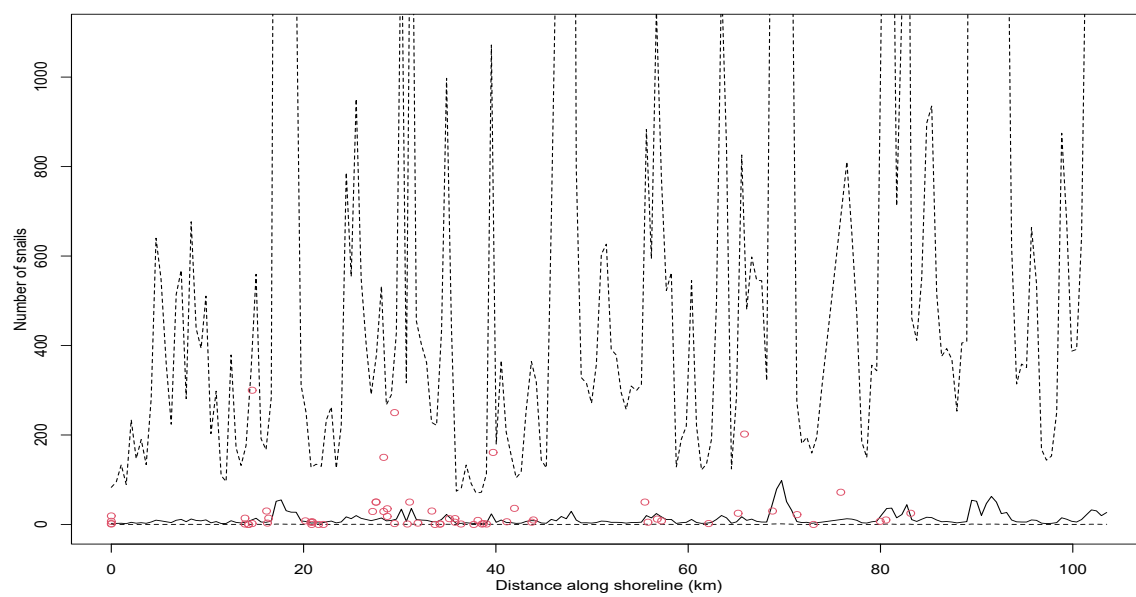

**Figure S1:** 1D medium Gaussian Prediction (GP) prediction (exponential covariance function) of number of snails log ( $\hat{\mu}_l$ ) against distance along the shoreline (km) a) *Biomphalaria* sp. b) *Bulinus* spp. Filled Straight line: Medium (50% credible intervals (Crl)) of GP prediction. Red circles: observed number of snails at sampling locations along the shoreline. Black faded lines: 95% Crl.
