# Supplementary material for: A geospatial analysis of local intermediate snail host distributions provides insight into schistosomiasis risk within under-sampled areas of southern Lake Malawi
Source: Research Square preprint supplement (doi:10.21203/rs.3.rs-3949127/v3), 2024-06-10
Supplement: Supplementary file [file a1c10355454c4564c2ec9cd5.pdf]

**Bathymetric data**

(a) *Biomphalaria* sp.

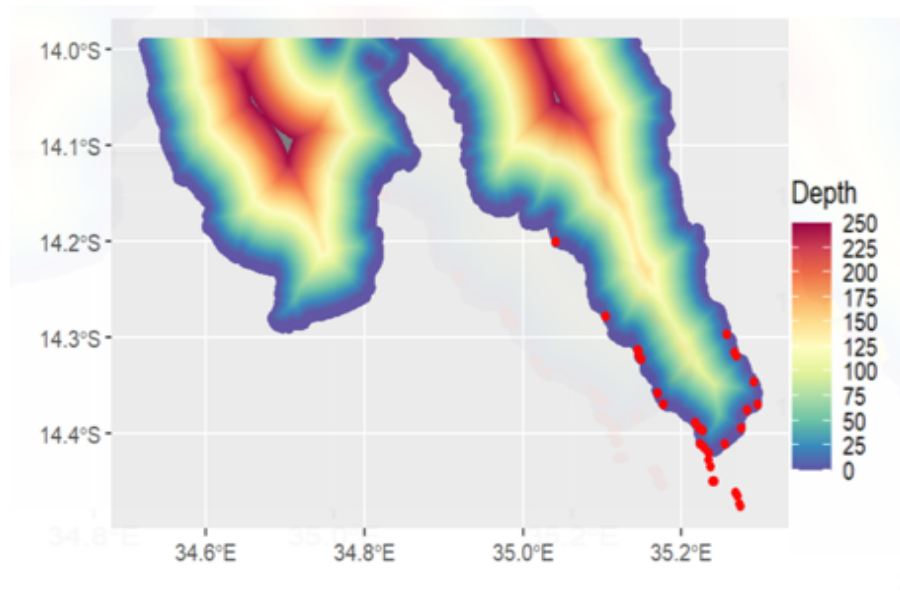

(b) *Bulinus* spp.

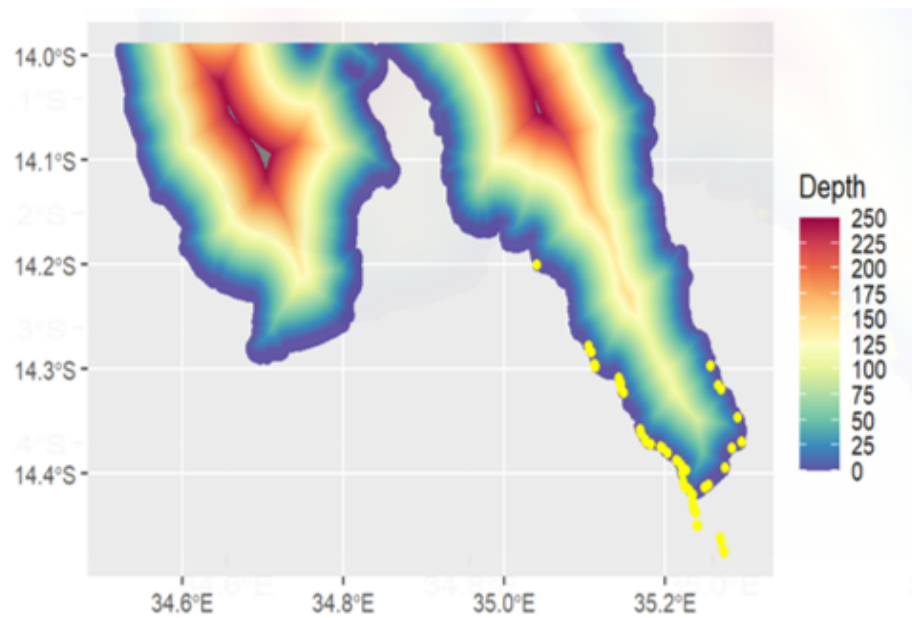

**Figure S1:** Bathymetric water depth (m) data for the shoreline with observed snails plotted a) *Biomphalaria* sp. b) *Bulinus* spp..

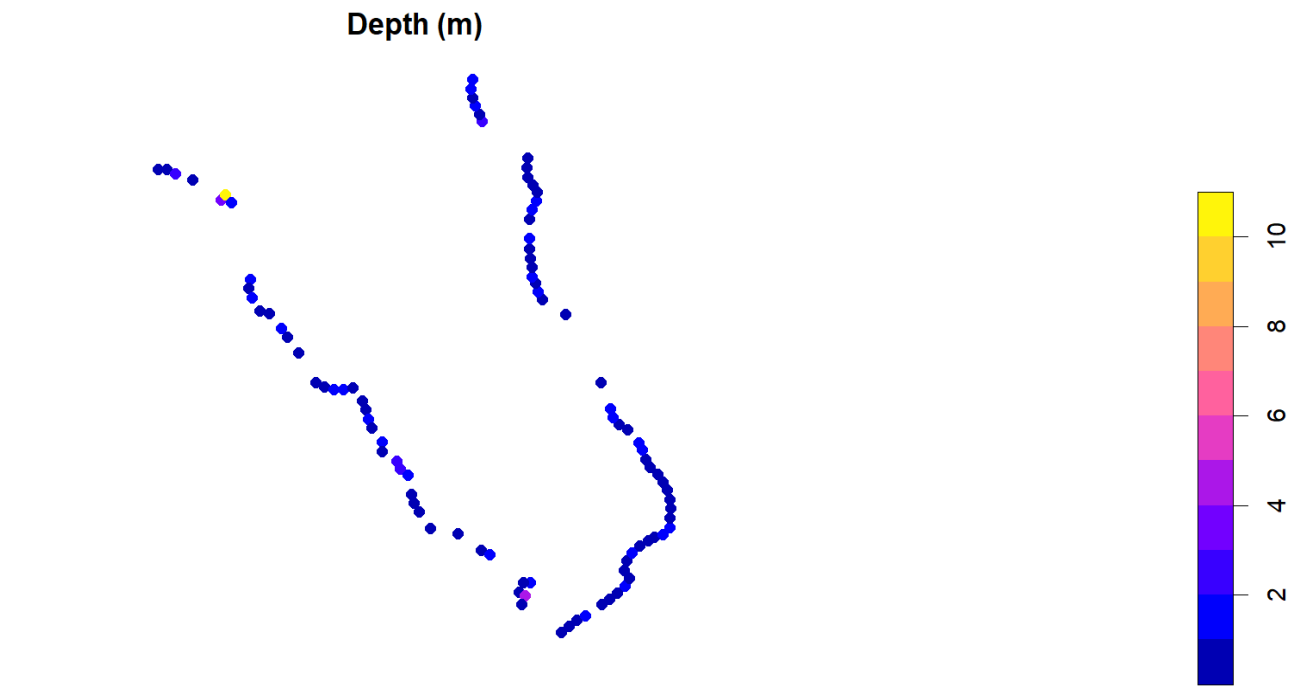

**Figure S2:** 2D plot of depth (m) extracted for the prediction points with 100km buffer.

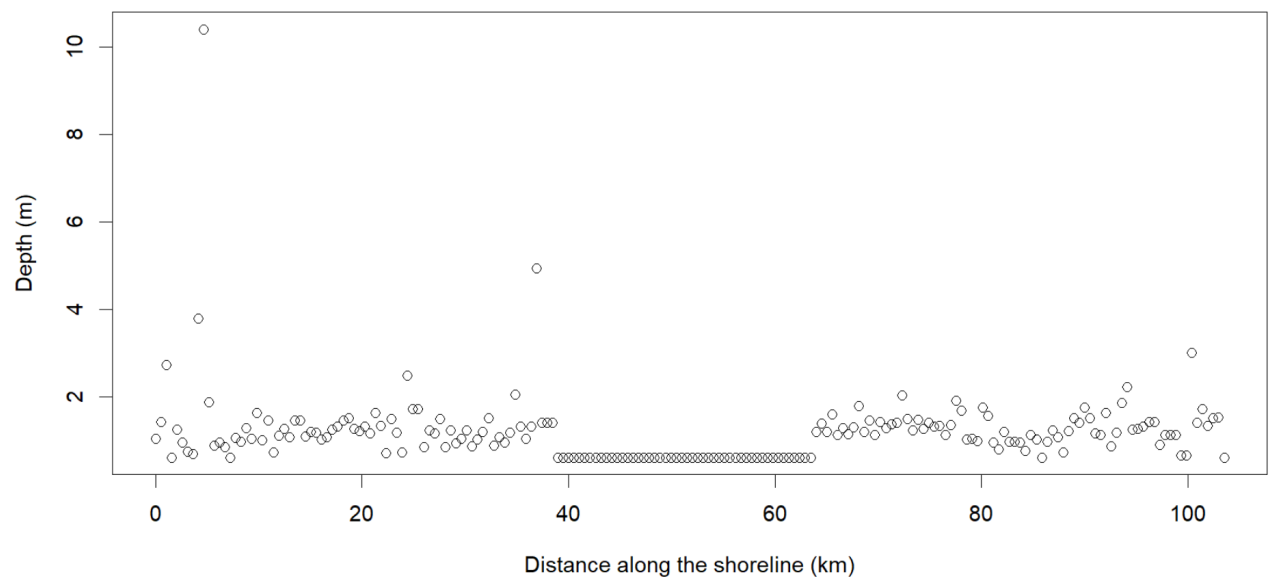

**Figure S3:** Depth (m) against distance along (km) the shoreline with 100km buffer and fill in NAs for the shoreline.
