# Supplementary material for: A geospatial analysis of local intermediate snail host distributions provides insight into schistosomiasis risk within under-sampled areas of southern Lake Malawi
Source: Research Square preprint supplement (doi:10.21203/rs.3.rs-3949127/v3), 2024-06-10
Supplement: Supplementary file [file caf456d70cbfd59646d66794.pdf]

*Additional file 4: Supplementary information*

**1D extracted environmental data**

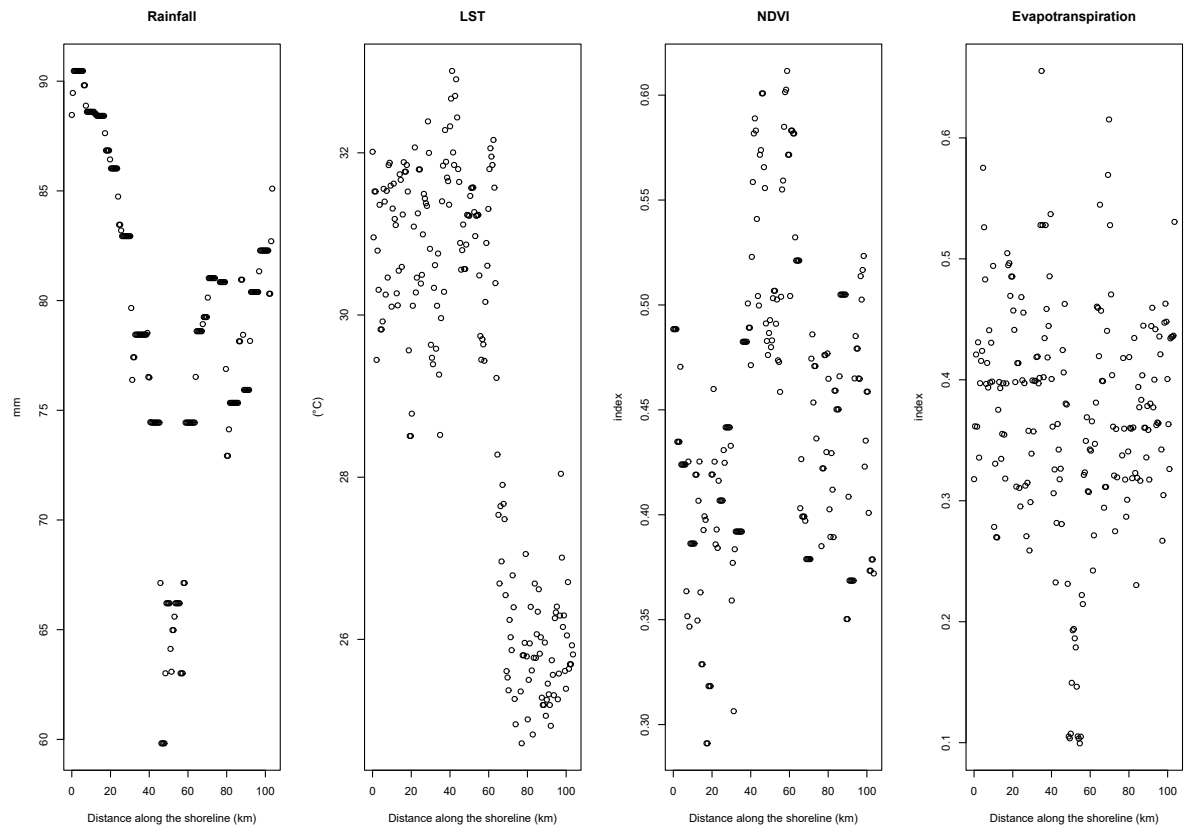

**Figure S1:** Scatterplot of environmental data versus distance along shoreline (km) for prediction points

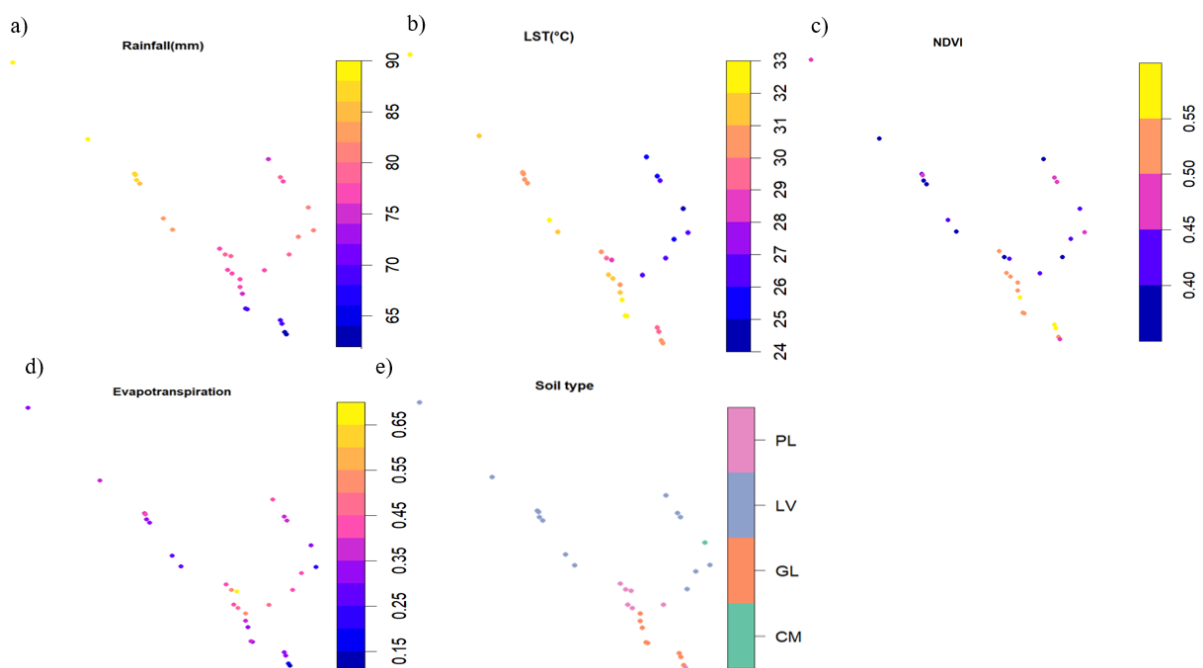

**Figure S2:** *Biomphalaria* sp. observed sample points extracted environmental data a) Rainfall (mm) b) LST (°C) c) NDVI (index) ) Evapotranspiration (index) e) Soil type

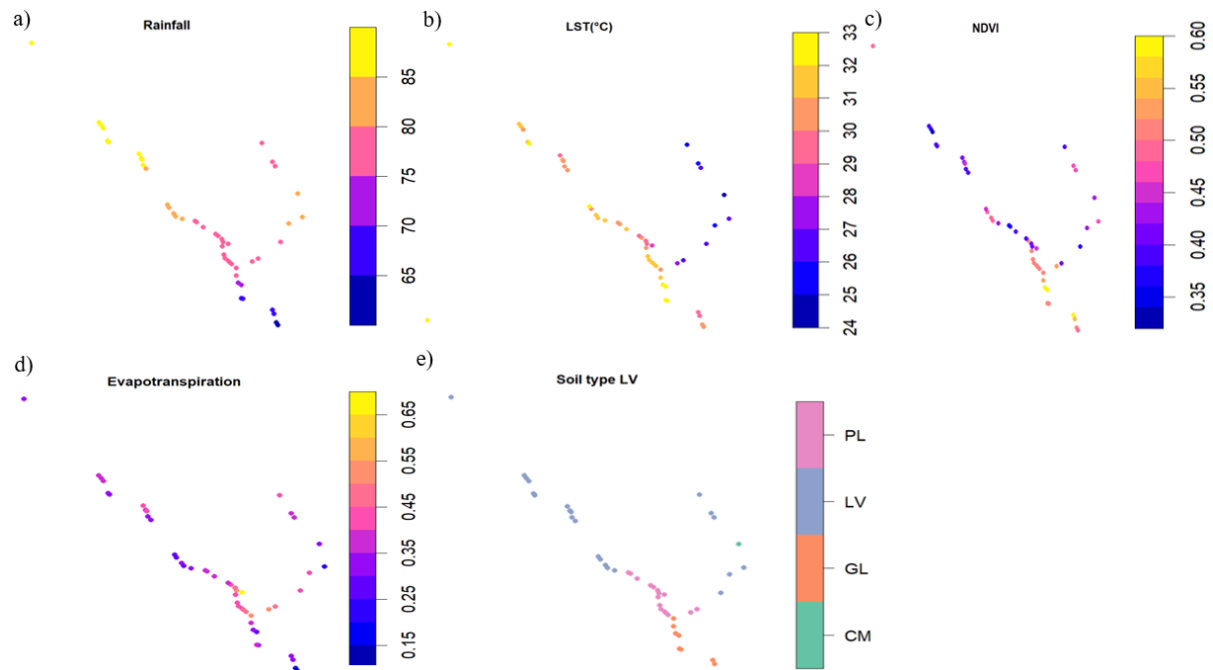

**Figure S3:** *Bulinus* spp. observed sample points extracted environmental data. a) Rainfall (mm) b) LST (°C) c) NDVI (index) ) Evapotranspiration (index) e) Soil type
