# Supplementary material for: A geospatial analysis of local intermediate snail host distributions provides insight into schistosomiasis risk within under-sampled areas of southern Lake Malawi
Source: Research Square preprint supplement (doi:10.21203/rs.3.rs-3949127/v3), 2024-06-10
Supplement: Supplementary file [file dddfd3bde1f014d69500bda5.pdf]

## **Model Formulation**

### ***Model***

We used a Bayesian log-linear Gaussian Process model to smooth observations of snail abundance along the shoreline. We assume that the number of snails  $y_i$  at observed (sampling) locations  $x_i$  expressed as distance along the shoreline relative to an arbitrary reference point follow a Poisson distribution with mean  $\mu_i$ :

$$y_i \sim \text{Poisson}(\mu_i),$$

The mean number of snails is then modelled on the log-scale as sum of two components: a set of covariates expressed through the design matrix  $Z$  and a Gaussian process:

$$\log(\mu_i) = \alpha + Z^T(x_i)\beta + S(x_i)$$

$S$  is modelled using a 1-Dimensional (1D) Gaussian process with exponential correlation function with standard deviation  $\sigma$  and fixed length scale  $\phi = 3.33\text{km}$  (5% range of measured shoreline). We also included an additional uncorrelated variance term  $\tau$  (nugget effect). We place priors on our unknown model parameters,

$$\alpha \sim N(0, 100)$$

$$\beta_i \sim N(0, 5)$$

$$\sigma \sim \Gamma(1, 1)$$

$$\tau \sim \Gamma(0.1, 0.1)$$

Where  $\Gamma$  distribution is defined using shape and rate parameters. The STAN probabilistic programming language was used to fit the model, allowing us to project the Gaussian process onto a fine grid of points along the shoreline to create predictions of snail abundance at arbitrary points in our study region.

### *GP prediction*

To get the GP prediction values we find the mean of the Poisson distribution variables.

$$\log(\hat{\mu}_i) = \hat{\alpha} + z^T(x_i^*)\hat{\beta} + \hat{s}(x_i^*),$$

where  $\hat{\mu}_i$  is our GP prediction of the number of snails present,  $x_i^*$  is the covariate values for each prediction point, where  $i=1, \dots, N$  point.

### *Latent Gaussian process*

$$s(\vec{x}) \sim GP(0, \Sigma^2)$$

Where the mean, 0 and  $\Sigma$  is the covariance matrix. The exponential covariance function is represented as the following:

$$\Sigma_{ij}^2 = \begin{cases} \sigma^2 e^{\frac{-\|x_i - x_j\|}{\sigma}} & \text{if } i \neq j \\ \sigma^2 + \tau^2 & \text{if } i = j \end{cases}$$

Where the covariance function uses the standard deviation  $\sigma$  with exponential Euclidean distance or the added nugget effect,  $\tau$ .
